# Supplementary material for: An fMRI Pilot Study of Cognitive Reappraisal in Children: Divergent Effects on Brain and Behavior
Source: Springer Nature journal article supplement (doi:10.1007/s10862-015-9492-z), 2015-05-18
Supplement: MOESM1 [file 572744]

| **Stimuli** | **Negative-Attend Condition** | **Negative-Decrease Condition** | **Negative Increase Condition** |
| --- | --- | --- | --- |
| IAPS1050 | This is a picture of an animal; it has its mouth open wide. | This is a snake that is harmless; it doesn't even have teeth. | This is a snake that is poisonous; it is very dangerous. |
| IAPS1120 | This is a picture of an animal; it is leaning forward with an open mouth. | This is a harmless snake that is opening its mouth to yawn after waking up. | This is a dangerous snake that is opening its mouth to attack. |
| IAPS1201 | This is a picture of a person with a creature crawling on his shoulder. | This is a pet spider that his owner likes to let crawl on his shoulder. | This is a wild spider that is dangerous; the person is really scared. |
| IAPS1300 | This is a picture of a furry animal; its eyes and mouth are open. | This is a dog that went to the dentist; look how clean his teeth are. | This is a wild dog that is dangerous; he will attack anyone he sees. |
| IAPS1302 | This is a picture of an animal; it is outside in the park. | This is a friendly and harmless dog trained to help children. | This is a mean and vicious dog trained to attack people. |
| IAPS1321 | This is a picture of an animal that was spotted standing in the forest. | This is a friendly and harmless bear that is yawning after a long nap. | This is a mean and dangerous bear that is searching for people to eat. |
| IAPS1525 | This is a picture of an animal with its mouth open wide. | This dog is tired and yawning after waking up from a long nap. | This mean and dangerous dog is angry and jumping to attack. |
| IAPS1930 | This is a picture of a shark swimming in the deep ocean. | This is a trained shark whose keeper is feeding him fish. | This is a wild shark that has attacked many people. |
| IAPS1932 | This is a picture of a shark with its mouth wide open. | This is a fake, plastic shark; it is being used in a movie. | This is a hungry shark; it attacks everything in sight. |
| IAPS2120 | This is a picture of a man’s face. His eyes are open wide. | This man has held his breath to try to make a red face. | This man is very angry and might become violent. |
| IAPS2130 | This is a picture of a woman that is standing outside. | This woman has an itch in her nose and is about to sneeze. | This woman has an angry temper and is about to hit people. |
| IAPS2457 | This is a picture of a young boy standing outside. | The child’s popsicle fell; luckily, his mother is buying him a new one. | The child is crying because he is lost and cannot find his mother. |
| IAPS2458 | This is a picture of a young baby girl with curly hair. | The baby heard a loud sound from a toy; she got scared but is totally ok. | The baby fell and got hurt; no one was there to help her. |
| IAPS2703 | This is a picture of young boy outside with several other children. | The children lost their brother; but they found him and are happy he is safe. | The children’s parents are leaving; they will never see them again. |
| IAPS2780 | This is a picture of a man standing in a dark room with his mouth open. | This is a friendly actor who is in a play about cats, which everybody loves. | This is an angry person who puts on makeup to scare people. |
| IAPS2810 | This is a picture of a young boy standing outside next to a fence. | This boy is playing 'hide and seek' and is yelling 'ready or not here I come'. | This boy is very angry and frustrated because he is not allowed to play. |
| IAPS2900 | This is a picture of a young boy standing next to a man outside. | This boy's dad picked him up after he fell; he got scared, but is totally okay. | This boy is very upset and sad because he found out that his pet ran away. |
| IAPS3022 | This is a picture of a man with his mouth wide open. | This person is on a super fun ride and is very happy and excited. | This person is really scared because he is trapped and can’t get out. |
| IAPS3230 | This is a picture of a man lying on a bed with his head on a pillow. | This man was very sick, but he is okay now and on his way to getting all better. | This man is very sick; he is worried that he may never get better. |
| IAPS3280 | This boy is sitting in a chair with a dentist standing beside him. | This boy is having his teeth cleaned; it really tickles but doesn’t hurt at all. | This boy is having a cavity filled; it feels painful; he can’t wait for it to end. |
| IAPS6300 | This is a picture of a man holding an object in his hand. | This person is using a knife to carve a pumpkin for Halloween. | This person is using a knife to attack and hurt people badly. |
| IAPS6312 | This is a picture of a man and a woman together by a large van. | This woman tripped but her friend caught her before she fell. | This man is a mean bully; he is knocking the woman over. |
| IAPS6370 | This is a picture of a man with his entire head covered under a mask. | This person is visiting his friend; he is wearing a mask because it is cold. | This person is dangerous and is hiding his face because he is a bad man. |
| IAPS7380 | This is a picture of food on a plate with several insects on it. | A boy put these fake bugs on the food in order to play a trick on his friend. | These disgusting bugs are crawling all over the food and ruining it. |
| IAPS9050 | This is a picture of an airplane and its many passengers. | The plane caught fire after it landed. Luckily, everyone was safe. | Sadly, many people were badly hurt in the terrible plane crash. |
| IAPS9250 | These are two doctors who are carrying a young woman. | These are the doctors who have saved the woman’s life. | Something terrible has happened to this person; she has been hurt badly. |
| IAPS9321 | This is a picture of a man with stuff coming out of his face. | This person laughed so hard milk sprayed everywhere! | This person is very sick and threw up all over the place. |
| IAPS9421 | This is a picture of a soldier sitting down with a broken arm. | This solider is so happy he is crying; the war is over and he is going home. | This solider is so sad he is crying; he is hurt and cannot go home. |
| IAPS9440 | This is a picture of many skulls stacked up somewhere outside. | A boy used plastic skulls to decorate a house for Halloween. | A boy found a frightening pile of skulls in the graveyard. |
| IAPS9480 | This is a picture of skulls sitting on the ground in the woods. | Scientists are studying these ancient bones to learn about the past. | People have come to see their families' bones; they make them very sad. |
| IAPS9490 | This is a picture of a man who is outside; he is covered in dirt. | This is a pretend mummy for a movie set; it is fake and funny looking. | This is someone who was buried alive; he was so scared. |
| IAPS9561 | This is a picture of a small cat that is sitting outside by himself. | This cat was sick, but doctors healed him and now he is all better | This poor cat lost its eye in a terrible and painful accident. |
| IAPS9582 | This is a picture of a boy in a chair at the dentist’s office. | This person just had his teeth cleaned; he feels all better. | This person is having surgery on his teeth and it hurts a lot! |
| IAPS9594 | This is a picture of a person at the doctor getting a needle. | This person gives blood all the time because it helps people who are sick. | This person hates to give blood because needles scare him a lot. |
| EMOP208 | This is a picture of a man holding a small boy in his arms. | This family just won a big prize and is so happy they are crying. | This family just lost their home in a fire and is sad and crying. |
| EMOP209 | This is a picture of a young boy holding his baby brother. | The baby fell but his big brother picked him up and he is fine. | The baby is very sick and everyone is scared that he won’t get better. |
| EMOP210 | This is a picture of a boy lying on a chair at the doctor’s office. | This boy was scared to go to the doctor, but now is fine and happy he went. | The doctor is about to perform a painful test on the sick child. |
| EMOP211 | This is a picture of a young boy standing outside. | This child was just found by his mother; he was scared but is now ok. | This child is lost and can’t find his mother; he is very scared. |
| EMOP212 | This is a picture of a small child sitting on a bed at the hospital. | This child fell but his mother is taking great care of him. | This child is in a lot of pain after a terrible and dangerous fall. |
| EMOP216 | This is a picture of a burning car and a girl who is running. | This girl escaped from the burning car; she is now safe and sound. | This girl was burned in the fiery car and is hurt badly. |
| EMOP225 | This is a picture of a boy’s face with tears falling from both his eyes. | This child was sad after fighting with friends but they are friends again. | This child is sad because he fought with friends; they don’t like him anymore. |
| EMOP235 | This is a picture of a child lying in his bed at the hospital. | This child is getting better and everyone is very happy. | This child is sick and everyone is very scared. |
| EMOP246 | This is a picture of a boy and his mother at the hospital. | This child was sick, but he is all better now. His mother is so happy. | This child is very sick, and doctors can’t help him get better. |
| EmoPicS251 | This is a picture of an old woman lying down in her bed. | This old woman is tired and is enjoying a nice long nap. | This old woman is sick and lonely with no one to visit her. |
| EMOP329 | This is a picture of a sea creature swimming underwater. | This shark lives at the aquarium and is harmless and friendly. | This shark lives in the ocean and is about to attack. |
| **Neutral Photos** | **Neutral-Attend Condition** |  |  |
| EMOP086 | This is a picture of a young boy sitting in a room full of people. |  |  |
| EMOP125 | This is a picture of a man standing in an office while talking on a phone. |  |  |
| EMOP126 | This is a picture of a waiter and some customers outside of a café. |  |  |
| EMOP130 | This is a picture of two bakers working to make loaves of bread. |  |  |
| EMOP133 | This is a picture of a man sitting at home and working on a computer. |  |  |
| EMOP142 | This is a picture of students working while sitting in a class. |  |  |
| EMOP162 | This is a picture of three women crossing the street. |  |  |
| EMOP173 | This is a picture of two women sleeping on a bench outside. |  |  |
| EMOP182 | This is a picture of a couple sitting by some trees outside. |  |  |
| EMOP267 | This is a picture of several camels standing in a field. |  |  |
| EMOP268 | This is a picture of a moose walking through the forest. |  |  |
| EMOP283 | This is a picture of a turtle lying outside on the ground. |  |  |
| EMOP302 | This is a picture of a bird standing in the sand on the beach. |  |  |
| EMOP339 | This is a picture of a plant growing between two rocks. |  |  |
| IAPS1600 | This is a picture of a horse standing outside in a grassy field. |  |  |
| IAPS 1670 | This is a picture of a large cow slowly walking through a field. |  |  |
| IAPS2222 | This is a picture of two young boys reading a book together. |  |  |
| IAPS2250 | This is a picture of a young girl standing in front of a wall. |  |  |
| IAPS2320 | This is a picture of a young girl reading a book at her classroom desk. |  |  |
| IAPS2342 | This is a picture of two girls feeding a bunch of pigeons outside |  |  |
| IAPS2359 | This is a picture of a child sitting in a grocery cart next to her mother. |  |  |
| IAPS2388 | This is a picture of two children walking down a sandy path. |  |  |
| IAPS2411 | This is a picture of a girl sitting in a room full of computers. |  |  |
| IAPS5530 | This is a picture of several small mushrooms outside in the grass. |  |  |
| IAPS7140 | This is a picture of a very large bus parked at a field outside. |  |  |
