# Supplementary material for: An fMRI Pilot Study of Cognitive Reappraisal in Children: Divergent Effects on Brain and Behavior
Source: Springer Nature journal article supplement (doi:10.1007/s10862-015-9492-z), 2015-05-18
Supplement: MOESM2 [file 572744]

*Online Resource 2.* Supplementary voxelwise analysis (clusters that survived multiple comparison correction based on 3dClustSim simulations at p = .005 (uncorrected) and minimum cluster extent of 35 voxels; peak MNI coordinates and cluster size [*k*])

**Negative-attend > Neutral-attend**

| Peak location | *x* | *y* | *z* | *k* |
| --- | --- | --- | --- | --- |
| Lingual gyri (bilateral) | -2 | -92 | -17 | 2243 |
| Precuneus (bilateral) | 1 | -56 | 4 | 306 |
| Middle Frontal gyrus (right) | 34 | 49 | 37 | 246 |
| Parahippocampal gyrus (right) | 28 | -44 | -8 | 142 |
| Parahippocampal gyrus (left) | -26 | -44 | -11 | 102 |
| Precentral gyrus (left) | -26 | -32 | 73 | 55 |

**Negative-decrease > Negative-attend**

| Peak location | *x* | *y* | *z* | *k* |
| --- | --- | --- | --- | --- |
| Middle temporal gyrus (right) | 70 | -20 | -20 | 342 |
| Middle temporal gyrus (left) | -56 | -56 | 25 | 78 |
| Middle temporal pole (right) | 31 | 22 | -44 | 131 |
